# Supplementary material for: Genetic Polymorphisms and Forensic Efficiencies of a Set of Novel Autosomal InDel Markers in a Chinese Mongolian Group
Source: Biomed Res Int. 2020 Jan 7;2020:3925189. doi: 10.1155/2020/3925189 (PMC6970480; doi:10.1155/2020/3925189)
Supplement: Supplementary Materials — Supplementary Figure 1: the geographic localization of the Chinese Mongolian and 27 reference groups. Supplementary Figure 2: principle component analysis of the Chinese Mongolian group and the 27 reference populations at individual levels based on PLINK software (version 1.90) and ggplot 2 package (version 3.2.0) of R software (version 3.4.5). The African individuals are represented by blue dots, the American individuals are represented by deep green dots, the East Asian individuals are represented by light green dots, the European individuals are represented by red dots, the Kazak individuals are represented by grey dots, the South Asian individuals are represented by purple dots, and the studied Mongolian individuals are represented by yellow dots. Supplementary Figure 3: the estimated probability value (a) and Delta K (b) at each K value. Supplementary Table 1: the pairwise P values of linkage disequilibrium (LD) tests among these 35 InDel loci in the Chinese Mongolian group. Supplementary Table 2: absolute values of insertion allelic frequency differences (δ) between the studied Mongolian group and the other reference intercontinental populations. Supplementary Table 3: the pairwise DA values of the Chinese Mongolian group and the 27 reference populations based on a panel of 35 InDels. Supplementary Table 4: the pairwise Fst values of the Chinese Mongolian group and the 27 reference populations based on a panel of 35 InDels. [file 3925189.f1.zip › 3925189.f1/Supplementary Table 1.xlsx]

## Sheet: Supplementary Table1
Supplementary Table 1. The pairwise P values of Linkage disequilibrium (LD) tests among these 35 InDel loci in Chinese Mongolian group.
Loci	rs3028455	rs2308194	rs3067194	rs10629077	rs5846092	rs3082950	rs1160964	rs4210	rs4024564	rs3040095	rs3839237	rs2307433	rs1610945	rs16678	rs25570	rs16646	rs3066543	rs3029940	rs5882232	rs3057689	rs66502133	rs3831219	rs34224758	rs5803454	rs3054057	rs61681053	rs10556291	rs10637537	rs10609615	rs139995318	rs141749783	rs4189	rs6480	rs5840847
rs2308194	0.330097
rs3067194	0.943185	0.75287
rs10629077	0.369601	0.761947	0.881125
rs5846092	0.367707	0.898286	0.575003	0.048876
rs3082950	0.720101	0.562021	0.939335	0.172948	0.897694
rs1160964	0.518513	0.0695567	0.189605	0.0897774	0.058353	0.196916
rs4210	0.560762	0.19057	0.869152	0.568932	0.552698	0.576106	0.0288738
rs4024564	0.829244	0.118728	0.204796	0.590125	0.0740867	0.825776	0.0126979	0.738737
rs3040095	0.443762	0.2226	0.98558	0.532	0.0264997	0.219907	0.00520547	0.425667	0.57712
rs3839237	0.938703	0.335089	0.181656	0.740125	0.291573	0.593493	0.564901	0.233673	0.684805	0.274784
rs2307433	0.901388	0.894941	0.673699	0.283246	0.0825212	0.467447	0.717918	0.624607	0.268694	0.347469	0.215032
rs1610945	0.680396	0.234448	0.194135	0.980666	0.653138	0.630518	0.588166	0.149418	0.387595	0.113737	0.96622	0.481215
rs16678	0.0870599	0.107923	0.684857	0.482374	0.964139	0.407715	0.363306	0.61353	0.594455	0.667938	0.965643	0.135492	0.598034
rs25570	0.932756	0.228449	0.259072	0.121056	0.414694	0.36023	0.821599	0.304791	0.827453	0.206172	0.757015	0.669349	0.880665	0.962304
rs16646	0.791275	0.840278	0.0714609	0.864747	0.0423398	0.104272	0.674312	0.243642	0.313761	0.776209	0.548907	0.0998354	0.0672771	0.672805	0.291336
rs3066543	0.705697	0.205988	0.889656	0.66063	0.358606	0.326618	0.883115	0.424657	0.966658	0.0573115	0.639911	0.977984	0.932808	0.918038	0.0362295	0.565462
rs3029940	0.130593	0.97646	0.40831	0.609655	0.242836	0.818076	0.994607	0.114874	0.372426	0.898577	0.0544317	0.637674	0.20933	0.262983	0.479326	0.981776	0.687794
rs5882232	0.41105	0.353712	0.990687	0.114477	0.0890841	0.454306	0.708056	0.924098	0.438576	0.414893	0.362287	0.273138	0.467622	0.341906	0.608381	0.132117	0.488902	0.515251
rs3057689	0.404742	0.920418	0.212677	0.77187	0.89875	0.904629	0.82856	0.119686	0.0643266	0.7044	0.902977	0.302153	0.276518	0.595627	0.756106	0.0412907	0.542019	0.765117	0.965799
rs66502133	0.899587	0.495157	0.766569	0.333321	0.896545	1	0.454198	0.340541	0.21196	0.749712	0.0668052	0.523072	0.630456	0.137741	0.582492	0.933552	0.911981	0.777587	0.0808957	0.538884
rs3831219	0.721353	0.929718	0.528259	0.787343	0.549041	0.810992	0.824796	0.152099	0.0875265	0.471909	0.565928	0.762077	0.807827	0.955541	0.540381	0.0214662	0.598343	0.371061	0.511745	0.556557	0.545432
rs34224758	0.408564	0.945914	0.851673	0.702022	0.506162	0.561462	0.972288	0.398716	0.872226	0.782704	0.840103	0.529903	0.511861	0.286419	0.543818	0.214293	0.784016	0.79028	0.051846	0.49216	0.284801	0.0819224
rs5803454	0.95196	0.738189	0.986388	0.736034	0.84762	0.0823754	0.586086	0.277383	0.986876	0.0163152	0.985312	0.375147	0.019333	0.251238	0.391052	0.36767	0.360293	0.209569	0.228671	0.123568	0.801849	0.629451	0.445798
rs3054057	0.802172	0.318298	0.342296	0.454382	0.0599785	0.458756	0.137273	0.235327	0.517503	0.159252	0.524768	0.375699	0.545206	0.922604	0.928709	0.167725	0.370895	0.868982	0.894534	0.770182	0.98719	0.655675	0.872396	0.894294
rs61681053	0.813532	0.205444	0.712231	0.914543	0.392633	0.872492	0.844355	0.434423	0.258424	0.147522	0.512838	0.555963	0.130042	0.849771	0.297986	0.377468	0.963537	0.322283	0.955833	0.10659	0.548537	0.97629	0.697633	0.829087	0.7429
rs10556291	1	0.425853	0.272453	1	0.680336	0.706761	0.00351418	0.720116	0.217062	0.168859	0.429856	0.0328095	0.858846	0.277782	0.423954	0.00401818	0.571527	0.712472	0.832448	0.564677	0.857656	0.250356	0.690098	1	0.0749782	0.562878
rs10637537	0.240386	0.876111	0.469574	0.00403362	0.549784	0.363347	0.838481	0.11547	0.843797	0.895459	0.0554928	0.986694	0.833193	0.868282	0.805475	0.861352	0.28385	0.595095	0.294348	0.522274	0.129534	0.0437714	0.275288	0.645003	0.464642	0.989713	0.703995
rs10609615	0.686983	0.235349	0.439943	0.0661611	0.0227939	0.0562803	0.376078	0.0890538	0.494251	0.889069	0.896922	0.390406	0.869679	0.486195	0.60586	0.828284	0.21883	0.0325164	0.00234953	0.0797313	0.0685004	0.164492	0.493733	0.439197	0.580389	0.846713	0.859945	0.372706
rs139995318	0.955606	0.161697	0.054441	0.233297	0.512476	0.219227	0.712408	0.823503	0.840727	0.200543	0.403484	0.900917	0.875487	0.726394	0.518837	0.212892	0.421536	0.949345	0.962832	0.318142	0.0418041	0.0374716	0.455356	0.581743	0.932053	0.150212	0.18238	0.277431	0.209295
rs141749783	0.921848	0.00672914	0.654954	0.173832	0.551709	0.0774917	0.349457	0.25888	0.822778	0.0898704	0.124871	0.716536	0.286596	0.905071	0.164644	0.900118	0.1731	0.660296	0.122449	0.91551	0.352183	0.829402	0.613914	0.540776	0.116178	0.563406	0.699708	0.279626	0.307107	0.450005
rs4189	0.458141	0.474561	0.384067	0.0444508	0.795503	0.365221	0.346547	0.524141	0.578047	0.760651	0.882706	0.926709	0.958622	0.114149	5.55176e-05	0.184742	0.65484	0.161198	0.0582211	0.325328	0.831662	0.74793	0.451781	0.520367	0.672981	0.977557	0.468228	0.448118	0.254753	0.952915	0.445424
rs6480	0.814515	0.453605	0.425302	0.771133	0.902546	0.794182	0.0928268	0.594427	0.564291	0.242687	0.937664	0.43063	0.438224	0.132264	0.0165699	0.160152	0.0067456	0.108184	0.0112135	0.717852	0.534016	0.470787	0.0857557	1	0.112387	0.605962	0.857829	0.984985	0.156822	0.485027	0.112796	0.0177244
rs5840847	0.881436	0.748542	0.37693	0.536924	0.155773	0.510139	0.337157	0.0441521	0.840381	0.825237	0.638851	0.818958	0.339232	0.373065	0.481654	0.886801	0.88767	0.212937	0.818284	0.00798594	0.42025	0.883075	0.692344	0.122116	0.815469	0.157977	0.192392	0.15688	0.95258	0.0780711	0.513373	0.889283	0.172209
rs371194629	0.411803	0.311591	0.830524	0.248377	0.512227	0.325296	0.892546	0.634815	0.309047	0.746363	0.667624	0.0964893	0.534555	0.931475	0.0335621	0.107427	0.762857	0.0973937	0.276201	0.204497	0.209711	0.113358	0.108349	0.622789	0.483954	0.959222	0.855705	0.264135	0.83013	0.143986	0.386668	0.0119628	0.134865	0.875544
