# Supplementary material for: Genetic Polymorphisms and Forensic Efficiencies of a Set of Novel Autosomal InDel Markers in a Chinese Mongolian Group
Source: Biomed Res Int. 2020 Jan 7;2020:3925189. doi: 10.1155/2020/3925189 (PMC6970480; doi:10.1155/2020/3925189)
Supplement: Supplementary Materials — Supplementary Figure 1: the geographic localization of the Chinese Mongolian and 27 reference groups. Supplementary Figure 2: principle component analysis of the Chinese Mongolian group and the 27 reference populations at individual levels based on PLINK software (version 1.90) and ggplot 2 package (version 3.2.0) of R software (version 3.4.5). The African individuals are represented by blue dots, the American individuals are represented by deep green dots, the East Asian individuals are represented by light green dots, the European individuals are represented by red dots, the Kazak individuals are represented by grey dots, the South Asian individuals are represented by purple dots, and the studied Mongolian individuals are represented by yellow dots. Supplementary Figure 3: the estimated probability value (a) and Delta K (b) at each K value. Supplementary Table 1: the pairwise P values of linkage disequilibrium (LD) tests among these 35 InDel loci in the Chinese Mongolian group. Supplementary Table 2: absolute values of insertion allelic frequency differences (δ) between the studied Mongolian group and the other reference intercontinental populations. Supplementary Table 3: the pairwise DA values of the Chinese Mongolian group and the 27 reference populations based on a panel of 35 InDels. Supplementary Table 4: the pairwise Fst values of the Chinese Mongolian group and the 27 reference populations based on a panel of 35 InDels. [file 3925189.f1.zip › 3925189.f1/Supplementary Table 2.xlsx]

## Sheet: Supplementary Table 2
Supplementary Table 2. Absolute values of insertion allelic frequency differences (δ) between the studied Mongolian group and other reference intercontinental populations.
Loci	African	American	East Asian	European	South Asian	Kazak
rs3028455	0.1876	0.0512	0.0444	0.1663	0.03	0.0893
rs2308194	0.0757	0.0787	0.0493	0.1285	0.0288	0.0574
rs3067194	0.1982	0.1098	0.0466	0.1652	0.0024	0.0092
rs10629077	0.0154	0.0152	0.0035	0.0069	0.3141	0.009
rs5846092	0.1149	0.0003	0.0337	0.1632	0.1261	0.0035
rs3082950	0.0649	0.0712	0.103	0.0314	0.1153	0.0373
rs1160964	0.2677	0.1281	0.0551	0.1565	0.0127	0.0504
rs4210	0.041	0.2081	0.0673	0.198	0.1099	0.0614
rs4024564	0.096	0.029	0.0184	0.1108	0.1221	0.0484
rs3040095	0.2482	0.0438	0.0643	0.0619	0.0567	0.019
rs3839237	0.3131	0.1842	0.0317	0.1072	0.0872	0.1251
rs2307433	0.4169	0.0557	0.0088	0.0465	0.0344	0.093
rs1610945	0.0219	0.1042	0.0058	0.2516	0.1246	0.0375
rs16678	0.2428	0.0077	0.017	0.0479	0.0807	0.035
rs25570	0.2422	0.0187	0.067	0.1238	0.0131	0.0419
rs16646	0.3805	0.028	0.0578	0.1256	0.1101	0.0393
rs3066543	0.0271	0.2923	0.1364	0.2905	0.3692	0.0724
rs3029940	0.4562	0.0308	0.0076	0.1339	0.037	0.0749
rs5882232	0.128	0.189	0.0652	0.3126	0.1585	0.0913
rs3057689	0.1361	0.0346	0.0154	0.0264	0.0227	0.0738
rs66502133	0.1022	0.0355	0.0722	0.1594	0.0729	0.0043
rs3831219	0.5069	0.0527	0.0787	0.1162	0.0246	0.1067
rs34224758	0.2604	0.0404	0.1231	0.2893	0.0721	0.0675
rs5803454	0.1491	0.0986	0.103	0.1384	0.2224	0.0653
rs3054057	0.0478	0.2142	0.0474	0.4109	0.1118	0.1073
rs61681053	0.1444	0.0131	0.0422	0.0194	0.0568	0.0123
rs10556291	0.1422	0.0634	0.0446	0.003	0.0133	0.0637
rs10637537	0.2012	0.0849	0.009	0.0398	0.1269	0.1055
rs10609615	0.0144	0.0512	0.0483	0.1604	0.2349	0.0962
rs139995318	0.3662	0.0355	0.0077	0.029	0.1554	0.0144
rs141749783	0.4366	0.1503	0.0886	0.0248	0.2131	0.0094
rs4189	0.3768	0.0583	0.0255	0.0767	0.0206	0.0021
rs6480	0.4949	0.0477	0.1411	0.02	0.0498	0.0333
rs5840847	0.0666	0.0781	0.0733	0.1871	0.0498	0.07
rs371194629	0.0138	0.0165	0.0497	0.0024	0.1563	0.0171
Note: The insertion allele frequency differences have been calculated between the reference populations and the Mongolian group after the integration of the subintercontinental populations.
