# Supplementary material for: Genetic Polymorphisms and Forensic Efficiencies of a Set of Novel Autosomal InDel Markers in a Chinese Mongolian Group
Source: Biomed Res Int. 2020 Jan 7;2020:3925189. doi: 10.1155/2020/3925189 (PMC6970480; doi:10.1155/2020/3925189)
Supplement: Supplementary Materials — Supplementary Figure 1: the geographic localization of the Chinese Mongolian and 27 reference groups. Supplementary Figure 2: principle component analysis of the Chinese Mongolian group and the 27 reference populations at individual levels based on PLINK software (version 1.90) and ggplot 2 package (version 3.2.0) of R software (version 3.4.5). The African individuals are represented by blue dots, the American individuals are represented by deep green dots, the East Asian individuals are represented by light green dots, the European individuals are represented by red dots, the Kazak individuals are represented by grey dots, the South Asian individuals are represented by purple dots, and the studied Mongolian individuals are represented by yellow dots. Supplementary Figure 3: the estimated probability value (a) and Delta K (b) at each K value. Supplementary Table 1: the pairwise P values of linkage disequilibrium (LD) tests among these 35 InDel loci in the Chinese Mongolian group. Supplementary Table 2: absolute values of insertion allelic frequency differences (δ) between the studied Mongolian group and the other reference intercontinental populations. Supplementary Table 3: the pairwise DA values of the Chinese Mongolian group and the 27 reference populations based on a panel of 35 InDels. Supplementary Table 4: the pairwise Fst values of the Chinese Mongolian group and the 27 reference populations based on a panel of 35 InDels. [file 3925189.f1.zip › 3925189.f1/Supplementary Table 4.xlsx]

## Sheet: Supplementary Table 4 
Supplementary Table 4. The pairwise Fst values of Chinese Mongolian group and 27 reference populations based on a panel of 35 InDels.
Populations	ACB	ASW	ESN	GWD	LWK	MSL	YRI	CLM	MXL	PEL	PUR	CDX	CHB	CHS	JPT	KHV	CEU	FIN	GBR	IBS	TSI	GIH	ITU	PJL	STU	BEB	Kazak
ASW	0.0004
ESN	0.0027	0.0129
GWD	0.0081	0.0156	0.0056
LWK	0.0084	0.0138	0.0073	0.0101
MSL	0.0064	0.016	0.0031	0.0001	0.0061
YRI	0.0036	0.0149	0.0006	0.0069	0.0086	0.0033
CLM	0.1285	0.103	0.1706	0.1776	0.166	0.1758	0.1768
MXL	0.1355	0.105	0.1791	0.1839	0.1718	0.1838	0.1863	0.0012
PEL	0.1437	0.1142	0.1812	0.185	0.1722	0.1883	0.1901	0.0193	0.0165
PUR	0.103	0.078	0.1427	0.1473	0.1414	0.1485	0.1491	0.0048	0.0118	0.0253
CDX	0.0998	0.0794	0.1318	0.1345	0.1205	0.1362	0.1415	0.0337	0.0293	0.0333	0.0351
CHB	0.0959	0.075	0.1287	0.1348	0.1199	0.1355	0.1342	0.0309	0.029	0.035	0.0346	0.0092
CHS	0.0919	0.0735	0.123	0.1269	0.1146	0.1303	0.1296	0.0347	0.0337	0.0369	0.0354	0.0035	0.0027
JPT	0.0884	0.0689	0.1166	0.1243	0.1091	0.1262	0.1238	0.0377	0.034	0.0413	0.0406	0.0141	0.0064	0.0073
KHV	0.0895	0.071	0.1191	0.1216	0.1089	0.1242	0.1256	0.0392	0.0368	0.0364	0.0359	0.0005	0.009	0.0032	0.0133
CEU	0.1715	0.1448	0.2188	0.2271	0.2175	0.2273	0.2222	0.0132	0.0223	0.056	0.0177	0.0712	0.0612	0.0676	0.0718	0.0749
FIN	0.1749	0.1492	0.2222	0.2304	0.2209	0.2301	0.2279	0.0203	0.0242	0.0606	0.0223	0.0794	0.068	0.0733	0.0768	0.0851	0.0053
GBR	0.1772	0.1491	0.2245	0.2315	0.2247	0.2337	0.2311	0.0144	0.0212	0.0541	0.0194	0.0755	0.0686	0.0734	0.0774	0.0829	0.0003	0.0052
IBS	0.1679	0.1396	0.2153	0.2217	0.2132	0.221	0.2193	0.0099	0.0182	0.0518	0.0148	0.0688	0.0621	0.0671	0.0749	0.0751	-0.0005	0.0074	0.0021
TSI	0.1751	0.1463	0.2213	0.2263	0.2202	0.2273	0.2256	0.0141	0.026	0.0545	0.016	0.0775	0.0744	0.077	0.0858	0.0831	0.0031	0.0148	0.0066	-0.0001
GIH	0.1366	0.1116	0.1729	0.1767	0.1696	0.1823	0.1857	0.0461	0.0382	0.0499	0.041	0.0357	0.0444	0.041	0.0485	0.042	0.0588	0.0608	0.0565	0.0547	0.0641
ITU	0.1361	0.1126	0.1744	0.1762	0.1694	0.1806	0.1838	0.0452	0.0395	0.0484	0.0409	0.0352	0.0465	0.0409	0.0514	0.0398	0.0604	0.0626	0.0599	0.055	0.0643	0.0037
PJL	0.1346	0.1102	0.1749	0.176	0.1708	0.1805	0.1858	0.0298	0.0271	0.0384	0.0238	0.0424	0.0516	0.0489	0.0562	0.0472	0.0449	0.0437	0.0409	0.0398	0.0445	0.0125	0.0076
STU	0.1274	0.1053	0.1638	0.167	0.1568	0.1701	0.1747	0.0376	0.0358	0.0374	0.033	0.0318	0.0433	0.0374	0.0447	0.0342	0.0587	0.0587	0.0594	0.0541	0.0601	0.007	0.0021	0.0086
BEB	0.1188	0.0966	0.156	0.1579	0.1508	0.1636	0.1668	0.0326	0.0299	0.0306	0.0287	0.0226	0.0294	0.0267	0.0329	0.0262	0.0527	0.0537	0.0518	0.0516	0.0591	0.0064	0.0032	0.01	0.0012
Kazak	0.1098	0.0858	0.1412	0.1484	0.1394	0.1501	0.1486	0.0109	0.0088	0.0263	0.013	0.0231	0.0175	0.0214	0.0192	0.029	0.0274	0.0293	0.0295	0.028	0.0338	0.0356	0.042	0.034	0.0367	0.0275
Mongolian	0.0988	0.0773	0.1329	0.1413	0.1266	0.1417	0.1403	0.0204	0.0184	0.0326	0.0231	0.0089	0.0067	0.0076	0.0067	0.0135	0.0454	0.0522	0.0522	0.0457	0.0551	0.0348	0.0396	0.0406	0.0343	0.0264	0.0056
Note: The red values are negative Fst values. ACB, African Caribbean in Barbados; ASW, African Ancestry in Southwest USA; ESN, Esan in Nigeria; GWD, Gambian in Western Division, Mandinka; LWK, Luhya in Webuye, Kenya; MSL, Mende in Sierra Leone; YRI, Yoruba in Ibadan, Nigeria; CLM, Colombian in Medellin, Colombia; MXL, Mexican Ancestry in Los Angeles, California; PEL, Peruvian in Lima, Peru; PUR, …
